# Supplementary material
Source: PubMed Central journal article supplement (PMC7295466)
Supplement: mmc1.pdf [file mmc1.pdf]

# THE LANCET

## Child & Adolescent Health

### Supplementary appendix

This appendix formed part of the original submission and has been peer reviewed.  
We post it as supplied by the authors.

Supplement to: Stewart DJ, Hartley JC, Johnson M, Marks SD, du Pré P, Stojanovic J.  
Renal dysfunction in hospitalised children with COVID-19. *Lancet Child Adolesc Health*  
2020; published online June 15. [http://dx.doi.org/10.1016/S2352-4642\(20\)30178-4](http://dx.doi.org/10.1016/S2352-4642(20)30178-4).

**Table – Demographics, clinical features, disease acuity, and markers of renal involvement in children and adolescents with COVID-19**

|                                             | All patients (n=52)              | Patients with AKI (n=15)          |
|---------------------------------------------|----------------------------------|-----------------------------------|
| <b>Demographics</b>                         |                                  |                                   |
| Median age, years                           | 9.4 (5.6-12.9)                   | 9 (7.7-10.5)                      |
| Sex                                         |                                  |                                   |
| Male                                        | 35 (67%)                         | 10 (67%)                          |
| Underlying comorbidities                    | 29 (56%)                         | 4 (27%)*                          |
| On immunosuppressive medication(s)          | 5 (10%)                          | 0                                 |
| <b>COVID-19</b>                             |                                  |                                   |
| <b>Clinical features at presentation</b>    |                                  |                                   |
| Fever                                       | 46 (88%)                         | 13 (87%)                          |
| Abdominal pain                              | 24 (46%)                         | 7 (47%)                           |
| Diarrhoea                                   | 22 (42%)                         | 11 (73%)                          |
| Cough                                       | 15 (29%)                         | 1 (7%)                            |
| Increased work of breathing                 | 23 (44%)                         | 10 (67%)                          |
| Vomiting                                    | 27 (52%)                         | 10 (67%)                          |
| Rhinitis                                    | 5 (10%)                          | 0                                 |
| <b>Disease acuity</b>                       |                                  |                                   |
| PICU admission                              | 37 (71%)                         | 14 (93%)                          |
| Median duration of PICU stay, days**        | 3 (2-3)                          | 3.5 (2-5)                         |
| Mechanical ventilation                      | 24 (46%)                         | 10 (67%)                          |
| Inotropic support                           | 26 (50%)                         | 13 (87%)                          |
| ECMO                                        | 1 (2%)                           | 0                                 |
| Multisystem inflammatory syndrome / PIMS-TS | 24 (46%)                         | 11 (73%)                          |
| <b>Markers of renal involvement</b>         |                                  |                                   |
| Creatinine >1 but <1.5 x ULRI               | 10 (19%) [range 37-114 µmol/L]   | ..                                |
| <b>AKI</b>                                  |                                  |                                   |
| AKI 1 (creatinine >1.5-2 x ULRI)            | 7 (13%) [range 63-148 µmol/L]    | 7 (47%)                           |
| AKI 2 (creatinine >2-3 x ULRI)              | 2 (4%) [range 111-133 µmol/L]    | 2 (13%)                           |
| AKI 3 (creatinine >3 x ULRI)                | 6 (12%) [range 179-275 µmol/L]   | 6 (40%)                           |
| Uraemia                                     | 26 (50%) [range 5.3-39.2 mmol/L] | 15 (100%) [range 5.3-39.2 mmol/L] |
| Proteinuria***                              | 5 (10%)                          | 2 (13%)                           |
| Haematuria****                              | 12 (23%)                         | 5 (33%)                           |
| Renal ultrasonography performed             | 28 (54%)                         | 11 (73%)                          |
| Acute renal ultrasound abnormalities        | 11 (21%)                         | 5 (33%)                           |
| Requirement for CRRT                        | 0                                | 0                                 |

Data are n (%) or median (IQR). AKI = acute kidney injury. CRRT = continuous renal replacement therapy. ECMO = extracorporeal membrane oxygenation. PICU = paediatric intensive care unit. PIMS-TS = paediatric inflammatory multisystem syndrome temporarily associated with SARS-CoV-2. ULRI = upper limit of reference interval.

\*Underlying comorbidities were methylmalonic acidaemia (MMA), obesity, prematurity, and type 1 diabetes mellitus. \*\*Maximum duration of PICU stay was 12 days. \*\*\*22/52 (42%) were screened for proteinuria. Proteinuria was detected in 5/22 (23%) screened for it. Proteinuria was detected in 2/8 (25%) of all AKI patients screened for it. \*\*\*\*40/52 (77%) were screened for haematuria. Haematuria was detected in 12/40 (30%) screened for it. Haematuria was detected in 5/14 (36%) of all AKI patients screened for it.

**Figure – Median serum creatinine and median estimated GFR values with interquartile range for the AKI cohort (n=15) followed during 12 days of admission (where data was available during that time period)**

□

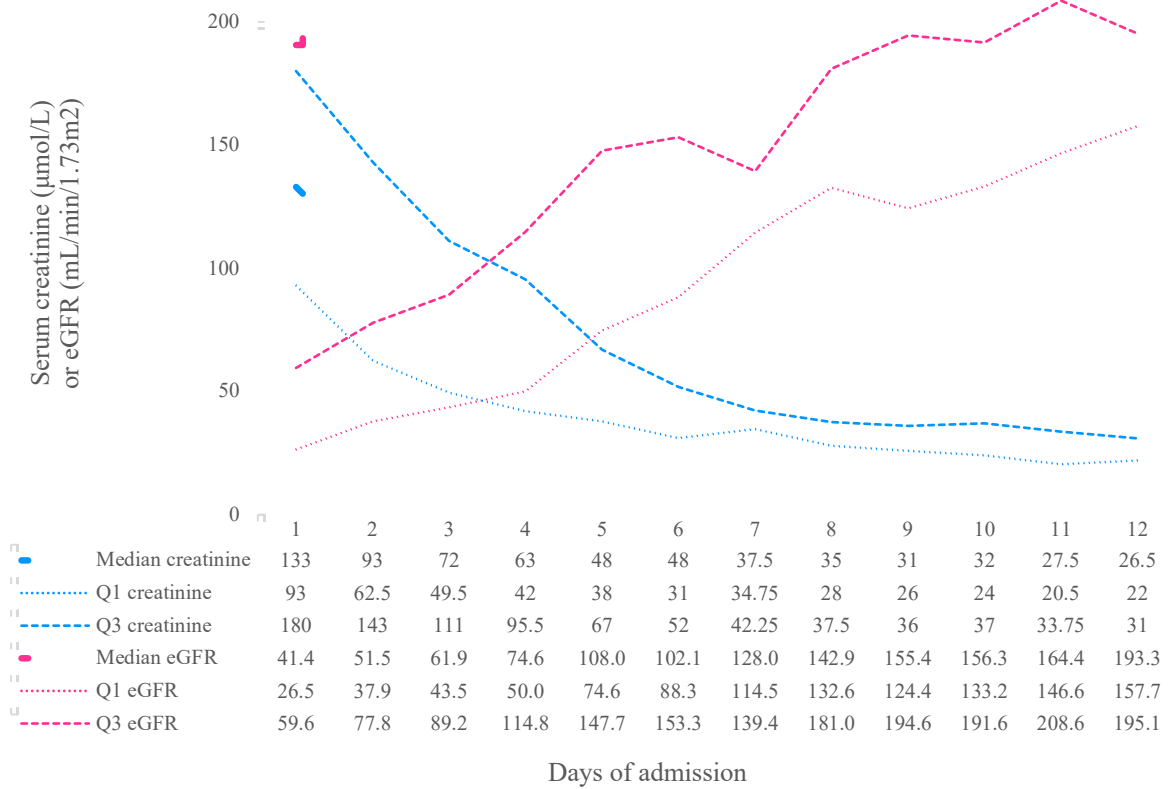

Estimated GFR values were calculated using revised Schwartz equation, where  $k = 36.5$ . Where height data was not available, height was substituted by the 50<sup>th</sup> percentile value for age. Twelve days of admission was chosen as this was the longest duration of stay in PICU by any one patient. eGFR = estimated glomerular filtration rate. Q1 = first quartile. Q3 = third quartile.
